# Supplementary material for: Serotonin 5-HT2A Receptor Activation Blocks TNF-α Mediated Inflammation In Vivo
Source: PLoS One. 2013 Oct 2;8(10):e75426. doi: 10.1371/journal.pone.0075426 (PMC3788795; doi:10.1371/journal.pone.0075426)
Supplement: Table S1 — Summary table of QPCR primer information. (XLSX) [file pone.0075426.s001.xlsx]

## Sheet: Sheet1
Gene Symbol	Sequence Accession Number	Primer Sequence	Amplicon Length	Universal Probe Library (Roche) Product #04683633001	Intron Spanning Assay
Icam1	NM_010493.2	(+)1183 CGAAGCTTCTTTTGCTCTGC	99 base amplicon length	10	Yes, exon 3/4 boundary
		(-)1264 GTCCAGCCGAGGACCATA
Vcam1	NM_011693.3	(+)1208 TGATTGGGAGAGACAAAGCA	110 base amplicon length	83	Yes, exon 4/5 boundary
		(-)1298 AACAACCGAATCCCCAACTT
IL6	NM_031168.1	(+)327 GCTACCAAACTGGATATAATCAGGA	78 base amplicon length	6	Yes, exon 3/4 boundary
		(-)381 CCAGGTAGCTATGGTACTCCAGAA
Ccl2 (syn: Mcp1)	NM_011333.3	(+)36 TCACTGAAGCCAGCTCTCTCT	96 base amplicon length	22	Yes, exon 1/2 boundry
		(-)114 GTGGGGCGTTAACTGCAT
Cx3cl1	NM_009142.3	(+)229 CATCCGCTATCAGCTAAACCA	78 base amplicon length	80	Yes, exon 2/3 boundary
		(-)287 CAGAAGCGTCTGTGCTGTGT
Htr2a	NM_172812.2	(+)1431 TGATGTCACTTGCCATAGCTG	105 base amplicon length	3	Yes, exon 1/2 boundary
		(-)1518 AGAGCTTGCTGGGCAAAG
Gapdh	NM_008084.2	(+)62 ATGGTGAAGGTCGGTGTG	84 base amplicon length	GAPDH Assay Probe Cat. no. 05046211001	Yes, exon 2/3 boundary
		(-)126 AATCTCCACTTTGCCACTGC
